# Supplementary material
Source: PubMed Central journal article supplement (PMC5885934)
Supplement: jamasurg-153-e174363-s001.pdf [file jamasurg-153-e174363-s001.pdf]

## Supplementary Online Content

Loehrer AP, Chang DC, Scott JW, et al. Association of the Affordable Care Act Medicaid expansion with access to and quality of care for surgical conditions. *JAMA Surg*. Published online January 24, 2018. doi:10.1001/jamasurg.2017.5568

**eTable 1.** List of Medicaid Expansion and Nonexpansion States Included in Study

**eTable 2.** ICD-9 Codes Used for Inclusion in Study

**eTable 3.** Coding for Early Uncomplicated Care and Optimal Care

**eTable 4.** Trends in Outcomes Before the Full Medicaid Expansion

**eTable 5.** Changes in Rates of Early Uncomplicated Presentation and Optimal Care for Select Surgical Conditions After Medicaid Expansion, by Condition and for Full Sample

**eTable 6.** Changes in Rates of Early Uncomplicated Presentation and Optimal Care for Select Surgical Conditions After Medicaid Expansion, by Condition and for Medicaid and Uninsured Patients

**eTable 7.** Changes in Rates of Early Uncomplicated Presentation and Optimal Care for Select Surgical Conditions After Medicaid Expansion, for Hospitals Present in Database for All 6 Years

**eTable 8.** Changes in Admission Rates After Medicaid Expansion

This supplementary material has been provided by the authors to give readers additional information about their work.

**eTable 1.** List of Medicaid Expansion and Nonexpansion States Included in Study

| <b>Expansion States</b> | <b>Nonexpansion States</b> |
|-------------------------|----------------------------|
| Arkansas                | Alabama                    |
| Arizona                 | Florida                    |
| California *            | Georgia                    |
| Colorado                | Kansas                     |
| Connecticut *           | Louisiana <sup>†</sup>     |
| Washington, DC          | Maine                      |
| Delaware                | Missouri                   |
| Iowa                    | Mississippi                |
| Illinois                | North Carolina             |
| Indiana                 | South Carolina             |
| Massachusetts           | Tennessee                  |
| Maryland                | Texas                      |
| Michigan                | Utah                       |
| Minnesota *             | Wisconsin                  |
| New Hampshire           | Wyoming                    |
| New Jersey *            |                            |
| New Mexico              |                            |
| New York                |                            |
| Ohio                    |                            |
| Oregon                  |                            |
| Pennsylvania            |                            |
| Rhode Island            |                            |
| Virginia                |                            |
| Washington *            |                            |
| West Virginia           |                            |

\* Early adopter of Medicaid expansion

<sup>†</sup> Adopted Medicaid expansion after study period (July 1, 2016)

**eTable 2. ICD-9 Codes Used for Inclusion in Study**

| <b>Diagnosis</b>                 | <b>ICD-9 Diagnosis Codes</b>                                                                                          | <b>ICD-9 Procedure Codes</b>                                                                                   |
|----------------------------------|-----------------------------------------------------------------------------------------------------------------------|----------------------------------------------------------------------------------------------------------------|
| <b>Acute Appendicitis</b>        | 540.0, 540.1, 540.9, 541, 542                                                                                         | 47.01, 47.09, 17.32, 17.39, 17.42                                                                              |
| <b>Acute Cholecystitis</b>       | 574.00, 574.01, 574.10, 574.11, 574.30, 574.31, 574.40, 574.41, 574.60, 574.61, 574.70, 574.71, 574.80, 575.0, 575.12 | N/A                                                                                                            |
| <b>Diverticular Disease</b>      | 562.10, 562.11, 562.12, 562.13                                                                                        | N/A                                                                                                            |
| <b>Peripheral Artery Disease</b> | 440.20, 440.21, 440.22, 440.23, 440.24, 440.29                                                                        | N/A                                                                                                            |
| <b>Aortic Aneurysm</b>           | 441.1, 441.2, 441.3, 441.4, 441.5, 441.6, 441.7, 441.9                                                                | 38.04, 38.05, 38.14, 38.15, 38.34, 38.35, 38.36, 38.44, 38.45, 38.46, 39.25, 39.71, 39.73, 39.78, 39.79, 39.90 |

*ICD-9* International Classification of Diseases, 9<sup>th</sup> Edition

**eTable 3.** Coding for Early Uncomplicated Care and Optimal Care

| <b>Component of “Optimal Care”</b>       | <b>ICD-9 Diagnosis or Procedure Codes</b>                     |
|------------------------------------------|---------------------------------------------------------------|
| <b>Early, Uncomplicated Presentation</b> | <b>Absence of Below Diagnosis Codes</b>                       |
| Diverticulitis                           | 567.31, 567.22, 567.38, 567.39, 569.81, 995.91, 995.92        |
| Aortic Aneurysm                          | 441.1, 441.3, 441.5, 441.6                                    |
| Peripheral Artery Disease                | 440.23, 440.24                                                |
| <b>Optimal Surgical Care</b>             | <b>Procedure Codes</b>                                        |
| Cholecystectomy                          | 51.21, 51.22, 51.23, 51.24                                    |
| Laparoscopic Appendectomy                | 47.01, 17.31, 17.39, 17.42                                    |
| Laparoscopic Cholecystectomy             | 51.23, 51.24                                                  |
| Absence of Amputation                    | 84.10, 84.11, 84.12, 84.13, 84.14, 84.15, 84.16, 84.17, 84.18 |

*ICD-9* International Classification of Diseases, 9<sup>th</sup> Edition

**eTable 4. Trends in Outcomes Before the Full Medicaid Expansion**

| <b>Outcome</b>                           | <b>Pre-Reform Time Trend*</b> | <b>95% CI (P-Value)</b> |
|------------------------------------------|-------------------------------|-------------------------|
| <b>Uninsured</b>                         | -0.6 percentage-points        | -1.1 to 0.0 (P=0.057)   |
| <b>Early, Uncomplicated Presentation</b> | -0.0 percentage-points        | -0.2 to 0.1 (P=0.907)   |
| <b>Optimal Care</b>                      | +0.0 percentage-points        | -0.3 to 0.4 (P=0.828)   |

\* Interaction between dichotomous Expansion State term and continuous period term, representing quarterly trend in outcomes for expansion states compared to non-expansion states prior to 2014, controlling for patient age, sex, race, comorbidity, secular trends and clustering at hospital level

**CI**—Confidence Interval

**eTable 5.** Changes in Rates of Early Uncomplicated Presentation and Optimal Care for Select Surgical Conditions After Medicaid Expansion, by Condition and for Full Sample

| <b>Early/Uncomplicated Presentation</b>                  |                         |      |      |                             |      |      |                                  |                                          |
|----------------------------------------------------------|-------------------------|------|------|-----------------------------|------|------|----------------------------------|------------------------------------------|
|                                                          | <b>Expansion States</b> |      |      | <b>Non-Expansion States</b> |      |      | <b>Difference-in-Differences</b> |                                          |
|                                                          | Pre                     | Post | Diff | Pre                         | Post | Diff | Unadjusted                       | Adjusted*                                |
| <b>Diverticulitis</b><br>(n=123,202)                     | 89.7                    | 88.1 | -1.6 | 89.3                        | 86.0 | -3.3 | +1.7 (P<0.001)                   | <b>+1.6</b><br>CI 0.5 to 2.7<br>P=0.004  |
| <b>Aortic Aneurysm</b><br>(n=20,127)                     | 93.8                    | 94.1 | +0.3 | 93.7                        | 92.7 | -1.0 | +1.3 (P=0.091)                   | <b>+1.3</b><br>CI -1.1 to 3.8<br>P=0.288 |
| <b>PAD</b><br>(n=46,806)                                 | 72.1                    | 69.1 | -3.0 | 73.1                        | 68.2 | -4.9 | +1.9 (P=0.057)                   | <b>+2.3</b><br>CI -0.2 to 4.9<br>P=0.072 |
| <b>Optimal Management</b>                                |                         |      |      |                             |      |      |                                  |                                          |
|                                                          | <b>Expansion States</b> |      |      | <b>Non-Expansion States</b> |      |      | <b>Difference-in-Differences</b> |                                          |
|                                                          | Pre                     | Post | Diff | Pre                         | Post | Diff | Unadjusted                       | Adjusted*                                |
| <b>Cholecystectomy for Cholecystitis</b><br>(n=19,093)   | 73.7                    | 70.5 | -3.2 | 73.8                        | 67.5 | -6.3 | +3.1 (P=0.048)                   | <b>+2.8</b><br>CI -0.0 to 5.7<br>P=0.051 |
| <b>MIS Appendectomy or Cholecystectomy</b><br>(n=95,500) | 78.6                    | 83.7 | +5.1 | 79.2                        | 82.7 | +3.5 | +1.5 (P=0.024)                   | <b>+1.9</b><br>CI -0.7 to 4.5<br>P=0.154 |
| <b>Limb-sparing PAD</b><br>(n=46,806)                    | 84.7                    | 82.7 | -2.0 | 82.0                        | 78.9 | -3.2 | +1.2 (P=0.128)                   | <b>+1.5</b><br>CI 0.9 to 4.0<br>P=0.219  |

**Full Sample** – all patients included in study (private insurance, Medicaid, and uninsured)

\* Adjusted for patient age, sex, race, comorbidity, secular trends and clustering at hospital level

**CI** – 95% Confidence Interval

**eTable 6.** Changes in Rates of Early Uncomplicated Presentation and Optimal Care for Select Surgical Conditions After Medicaid Expansion, by Condition and for Medicaid and Uninsured Patients

| <b>Early/Uncomplicated Presentation</b>                  |                         |      |      |                             |      |      |                                  |                                          |
|----------------------------------------------------------|-------------------------|------|------|-----------------------------|------|------|----------------------------------|------------------------------------------|
|                                                          | <b>Expansion States</b> |      |      | <b>Non-Expansion States</b> |      |      | <b>Difference-in-Differences</b> |                                          |
|                                                          | Pre                     | Post | Diff | Pre                         | Post | Diff | Unadjusted                       | Adjusted*                                |
| <b>Diverticulitis</b><br>(n=40,644)                      | 88.1                    | 86.8 | -1.3 | 86.7                        | 83.6 | -3.1 | +1.7 (P=0.026)                   | <b>+1.8</b><br>CI -0.3 to 3.8<br>P=0.086 |
| <b>Aortic Aneurysm</b><br>(n=4,201)                      | 87.5                    | 88.2 | +0.7 | 87.3                        | 86.1 | -1.2 | +2.1<br>P=0.369                  | <b>+2.2</b><br>CI -2.3 to 6.6<br>P=0.338 |
| <b>PAD</b><br>(n=22,559)                                 | 66.6                    | 65.3 | -1.3 | 68.7                        | 62.5 | -6.2 | +4.8 (P=0.001)                   | <b>+4.9</b><br>CI 1.7 to 8.1<br>P=0.003  |
| <b>Optimal Management</b>                                |                         |      |      |                             |      |      |                                  |                                          |
|                                                          | <b>Expansion States</b> |      |      | <b>Non-Expansion States</b> |      |      | <b>Difference-in-Differences</b> |                                          |
|                                                          | Pre                     | Post | Diff | Pre                         | Post | Diff | Unadjusted                       | Adjusted*                                |
| <b>Cholecystectomy for Cholecystitis</b><br>(n=8,308)    | 68.9                    | 65.5 | -3.4 | 70.0                        | 62.9 | -7.1 | +3.6 (P=0.140)                   | <b>+3.4</b><br>CI -1.1 to 8.0<br>P=0.140 |
| <b>MIS Appendectomy or Cholecystectomy</b><br>(n=37,574) | 76.9                    | 84.0 | +7.1 | 77.0                        | 81.9 | +4.9 | +2.1 (P=0.050)                   | <b>+2.3</b><br>CI -1.8 to 6.4<br>P=0.265 |
| <b>Limb-sparing PAD</b><br>(n=22,559)                    | 80.7                    | 80.2 | -0.5 | 78.5                        | 73.8 | -4.7 | +4.2 (P=0.001)                   | <b>+4.1</b><br>CI 0.5 to 7.7<br>P=0.027  |

\* Adjusted for patient age, sex, race, comorbidity, secular trends and clustering at hospital level

CI – 95% Confidence Interval

**eTable 7.** Changes in Rates of Early Uncomplicated Presentation and Optimal Care for Select Surgical Conditions After Medicaid Expansion, for Hospitals Present in Database for All 6 Years

| <b>Early/Uncomplicated Presentation</b> |                         |      |      |                             |      |      |                                  |                                          |
|-----------------------------------------|-------------------------|------|------|-----------------------------|------|------|----------------------------------|------------------------------------------|
|                                         | <b>Expansion States</b> |      |      | <b>Non-Expansion States</b> |      |      | <b>Difference-in-Differences</b> |                                          |
|                                         | Pre                     | Post | Diff | Pre                         | Post | Diff | Unadjusted                       | Adjusted*                                |
| <b>Full Sample</b><br>(n=160,475)       | 85.9                    | 84.4 | -1.5 | 85.5                        | 82.3 | -3.2 | +1.8 (P<0.001)                   | <b>+1.8</b><br>CI 0.6 to 2.9<br>P=0.003  |
| <b>Private Insurance</b><br>(n=105,192) | 88.3                    | 86.8 | -1.5 | 88.6                        | 85.5 | -3.1 | +1.6<br>(P=0.001)                | <b>+1.6</b><br>CI 0.3 to 2.8<br>P=0.012  |
| <b>Medicaid/Uninsured</b><br>(n=55,283) | 81.1                    | 80.0 | -1.1 | 80.3                        | 76.1 | -4.2 | +3.0<br>(P<0.001)                | <b>+3.0</b><br>CI 1.1 to 4.9<br>P=0.002  |
| <b>Optimal Management</b>               |                         |      |      |                             |      |      |                                  |                                          |
|                                         | <b>Expansion States</b> |      |      | <b>Non-Expansion States</b> |      |      | <b>Difference-in-Differences</b> |                                          |
|                                         | Pre                     | Post | Diff | Pre                         | Post | Diff | Unadjusted                       | Adjusted*                                |
| <b>All Payers</b><br>(n=124,006)        | 81.0                    | 82.7 | +1.7 | 81.2                        | 80.7 | -0.5 | +2.2 (P<0.001)                   | <b>+2.3</b><br>CI 0.7 to 4.0<br>P=0.006  |
| <b>Private Insurance</b><br>(n=72,751)  | 83.3                    | 84.5 | +1.2 | 84.0                        | 83.7 | -0.3 | +1.5<br>(P=0.035)                | <b>+1.7</b><br>CI -0.2 to 3.5<br>P=0.073 |
| <b>Medicaid/Uninsured</b><br>(n=51,255) | 77.4                    | 80.3 | +2.9 | 77.7                        | 76.7 | -1.0 | +4.0 (P<0.001)                   | <b>+3.8</b><br>CI 1.0 to 6.5<br>P=0.007  |

**Full Sample** – all patients included in study (private insurance, Medicaid, and uninsured)

\* Adjusted for patient age, sex, race, comorbidity, secular trends and clustering at hospital level

**CI** – 95% Confidence Interval



**eTable 8. Changes in Admission Rates After Medicaid Expansion**

| Admission Rates*                         | Expansion States |      |      | Non-Expansion States |      |      | Difference-in-Differences |                                           |
|------------------------------------------|------------------|------|------|----------------------|------|------|---------------------------|-------------------------------------------|
|                                          | Pre              | Post | Diff | Pre                  | Post | Diff | Unadjusted Rate           | Adjusted IRR                              |
| <b>Full Sample</b><br>(n=293,529)        | 30.5             | 29.4 | -1.1 | 27.8                 | 27.0 | -0.8 | -0.3                      | <b>0.99</b><br>CI 0.97 to 1.00<br>P=0.135 |
| <b>Private Insurance</b><br>(n=184,269)  | 36.2             | 34.6 | -1.6 | 32.3                 | 31.2 | -0.9 | -0.7                      | <b>0.98</b><br>CI 0.98 to 0.99<br>P<0.001 |
| <b>Medicaid/Uninsured</b><br>(n=109,260) | 20.4             | 20.6 | -0.2 | 20.8                 | 20.7 | -0.1 | -0.1                      | <b>1.02</b><br>CI 1.01 to 1.03 P<0.001    |

\* Admissions per hospital per quarter

**Full Sample** – all patients included in study (private insurance, Medicaid, and uninsured)

**IRR** – admission incident rate ratio, adjusted for patient age, sex, race, comorbidity, secular trends and clustering at hospital level

**CI** – 95% Confidence Interval
